# Supplementary material
Source: PubMed Central journal article supplement (PMC10984694)
Supplement: NIHMS1909869-supplement-1.pdf [file NIHMS1909869-supplement-1.pdf]

# Supplemental Data

Table S1

|                             | Included Patients<br>(N=463) | Excluded Patients<br>(N=427) | P-value | Total<br>(N=890)  |
|-----------------------------|------------------------------|------------------------------|---------|-------------------|
| <b>Age (y)</b>              |                              |                              | 0.00472 |                   |
| Median [IQR]                | 12.1 [5.6, 16]               | 10.0 [4.8, 15.5]             |         | 11.0 [5.1, 15.8]  |
| <b>Treatment center</b>     |                              |                              |         |                   |
| MSK                         | 227 (49.0%)                  | 45 (10.5%)                   | <0.001  | 272 (30.6%)       |
| PMC                         | 149 (32.2%)                  | 53 (12.4%)                   |         | 202 (22.7%)       |
| SJCRH                       | 87 (18.8%)                   | 329 (77.0%)                  |         | 416 (46.7%)       |
| <b>Gender</b>               |                              |                              | 0.126   |                   |
| Male                        | 274 (59.2%)                  | 230 (53.9%)                  |         | 504 (56.6%)       |
| Female                      | 189 (40.8%)                  | 197 (46.1%)                  |         | 386 (43.4%)       |
| <b>Diagnosis</b>            |                              |                              | 0.0173  |                   |
| ALL                         | 202 (43.6%)                  | 157 (36.8%)                  |         | 359 (40.3%)       |
| AML                         | 171 (36.9%)                  | 187 (43.8%)                  |         | 358 (40.2%)       |
| MDS                         | 41 (8.9%)                    | 22 (5.2%)                    |         | 63 (7.1%)         |
| NHL                         | 17 (3.7%)                    | 20 (4.7%)                    |         | 37 (4.2%)         |
| Other                       | 32 (6.9%)                    | 41 (9.6%)                    |         | 73 (8.2%)         |
| <b>Cell source</b>          |                              |                              | <0.001  |                   |
| BM                          | 155 (33.5%)                  | 193 (45.2%)                  |         | 348 (39.1%)       |
| Cord                        | 120 (25.9%)                  | 50 (11.7%)                   |         | 170 (19.1%)       |
| PBSC                        | 188 (40.6%)                  | 184 (43.1%)                  |         | 372 (41.8%)       |
| <b>HLA matching</b>         |                              |                              | <0.001  |                   |
| Matched                     | 245 (52.9%)                  | 182 (42.6%)                  |         | 427 (48.0%)       |
| Mismatched                  | 214 (46.2%)                  | 190 (44.5%)                  |         | 404 (45.4%)       |
| Missing                     | 4 (0.9%)                     | 55 (12.9%)                   |         | 59 (6.6%)         |
| <b>Conditioning regimen</b> |                              |                              | 0.0235  |                   |
| Only chemotherapy           | 282 (60.9%)                  | 227 (53.2%)                  |         | 509 (57.2%)       |
| Chemotherapy and TBI        | 181 (39.1%)                  | 200 (46.8%)                  |         | 381 (42.8%)       |
| <b>Ex vivo TCD</b>          |                              |                              | 0.194   |                   |
| No                          | 271 (58.5%)                  | 270 (63.2%)                  |         | 541 (60.8%)       |
| Yes                         | 192 (41.5%)                  | 156 (36.5%)                  |         | 348 (39.1%)       |
| Missing                     | 0 (0%)                       | 1 (0.2%)                     |         | 1 (0.1%)          |
| <b>Serotherapy</b>          |                              |                              | 0.0747  |                   |
| No                          | 212 (45.8%)                  | 222 (52.0%)                  |         | 434 (48.8%)       |
| Yes                         | 251 (54.2%)                  | 205 (48.0%)                  |         | 456 (51.2%)       |
| <b>Year</b>                 |                              |                              | <0.001  |                   |
| Median [Min, Max]           | 2015 [2008, 2019]            | 2013 [2008, 2019]            |         | 2014 [2008, 2019] |

**Table S1. Demographics and transplant characteristics of included and excluded patients.** *P*-values calculated comparing included and excluded patients, using two-sample *t*-test for continuous data and Chi-square test for categorical data.

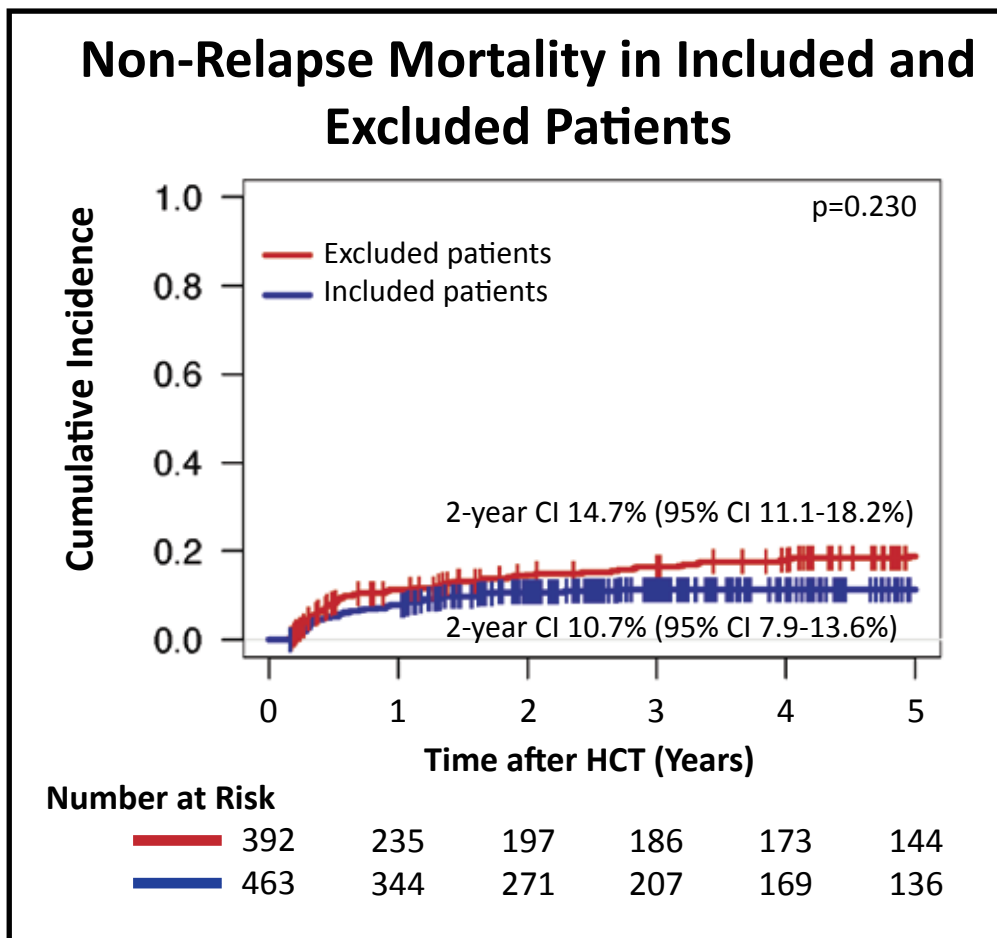

**Figure S1. Non-relapse mortality by patients included versus excluded from our CD4 > 50 cells/ $\mu$ L and B Cell > 25 cells/ $\mu$ L analyses.** Patients who died before the median time to CD4 and B cell IR were excluded. No significant difference was found between the cumulative incidence of NRM between the two groups (p=0.230 by multivariable Fine-Gray method).

### Multivariable Cox Proportional Hazard Analysis for Non-Relapse Mortality

| Variable               | N   | Hazard ratio      | p      |
|------------------------|-----|-------------------|--------|
| <b>Age</b>             |     |                   |        |
| 0–3 years              | 69  | Reference         |        |
| 3–10 years             | 119 | 0.49 (0.18, 1.37) | 0.175  |
| 10–18 years            | 206 | 0.80 (0.31, 2.11) | 0.657  |
| >18 years              | 65  | 0.23 (0.06, 0.88) | 0.031  |
| <b>Diagnosis</b>       |     |                   |        |
| ALL                    | 201 | Reference         |        |
| AML                    | 169 | 0.66 (0.32, 1.36) | 0.263  |
| Other                  | 89  | 0.62 (0.28, 1.36) | 0.232  |
| <b>Source</b>          |     |                   |        |
| BM                     | 153 | Reference         |        |
| Cord                   | 120 | 0.86 (0.33, 2.19) | 0.746  |
| PBSC                   | 186 | 2.29 (0.60, 8.78) | 0.228  |
| <b>HLA_match</b>       |     |                   |        |
| Matched                | 245 | Reference         |        |
| Mismatched             | 214 | 1.74 (0.85, 3.57) | 0.132  |
| <b>Conditioning</b>    |     |                   |        |
| Only chemotherapy      | 278 | Reference         |        |
| Chemo and TBI          | 181 | 0.73 (0.37, 1.46) | 0.376  |
| <b>TCD_Serotherapy</b> |     |                   |        |
| None                   | 165 | Reference         |        |
| Only TCD               | 44  | 0.46 (0.08, 2.57) | 0.376  |
| Only Serotherapy       | 103 | 1.33 (0.61, 2.91) | 0.476  |
| Both                   | 147 | 0.34 (0.07, 1.58) | 0.170  |
| <b>CD4_Bcell_IR</b>    |     |                   |        |
| None                   | 33  | Reference         |        |
| Only CD4IR             | 85  | 0.26 (0.11, 0.62) | 0.002  |
| Only B–cell IR         | 72  | 0.44 (0.18, 1.08) | 0.072  |
| Both CD4 and B–cell IR | 269 | 0.06 (0.03, 0.16) | <0.001 |
| <b>HCT_Year</b>        |     |                   |        |
| Before 2015            | 225 | Reference         |        |
| 2015 or after          | 234 | 0.54 (0.28, 1.03) | 0.060  |

| Variable               | N   | Hazard ratio      | p      |
|------------------------|-----|-------------------|--------|
| <b>Age</b>             |     |                   |        |
| 0–3 years              | 71  | Reference         |        |
| 3–10 years             | 120 | 0.43 (0.16, 1.14) | 0.088  |
| 10–18 years            | 207 | 0.64 (0.27, 1.55) | 0.325  |
| >18 years              | 65  | 0.19 (0.05, 0.69) | 0.012  |
| <b>CD4_Bcell_IR</b>    |     |                   |        |
| None                   | 33  | Reference         |        |
| Only CD4IR             | 86  | 0.30 (0.13, 0.66) | 0.003  |
| Only B–cell IR         | 72  | 0.40 (0.18, 0.88) | 0.023  |
| Both CD4 and B–cell IR | 272 | 0.07 (0.03, 0.16) | <0.001 |
| <b>HCT_Year</b>        |     |                   |        |
| Before 2015            | 228 | Reference         |        |
| 2015 or after          | 235 | 0.64 (0.36, 1.14) | 0.128  |

**Table S2. Multivariable Cox Proportional Hazard Analysis for NRM.** CD4 and B cell immune reconstitution were found to be predictors of decreased risk of NRM in multivariable analyses (left panel). Age above 18 years was also found to be predictive of NRM in this cohort. Since there were 54 events of NRM, to control for overfitting, analyses were also run including less covariates (see methods), leading to similar results (right panel).

# Supplemental Data

## Multivariable Cox Proportional Hazard Analysis for Relapse (Full Cohort)

| Variable        | N                      | Hazard ratio      | p    |
|-----------------|------------------------|-------------------|------|
| Age             | 0–3 years              | Reference         |      |
|                 | 3–10 years             | 0.71 (0.38, 1.31) | 0.27 |
|                 | 10–18 years            | 0.89 (0.50, 1.58) | 0.68 |
|                 | >18 years              | 0.32 (0.13, 0.81) | 0.02 |
| Diagnosis       | ALL                    | Reference         |      |
|                 | AML                    | 1.24 (0.77, 2.02) | 0.38 |
|                 | Other                  | 0.80 (0.44, 1.47) | 0.48 |
| Source          | BM                     | Reference         |      |
|                 | Cord                   | 1.24 (0.67, 2.29) | 0.50 |
|                 | PBSC                   | 1.38 (0.54, 3.50) | 0.50 |
| HLA_match       | Matched                | Reference         |      |
|                 | Mismatched             | 0.89 (0.55, 1.45) | 0.64 |
| Conditioning    | Only chemotherapy      | Reference         |      |
|                 | Chemo and TBI          | 0.99 (0.59, 1.66) | 0.96 |
| TCD_Serotherapy | None                   | Reference         |      |
|                 | Only TCD               | 0.87 (0.27, 2.80) | 0.82 |
|                 | Only Serotherapy       | 1.12 (0.67, 1.90) | 0.66 |
| CD4_Bcell_IR    | Both                   | 0.84 (0.32, 2.25) | 0.73 |
|                 | None                   | Reference         |      |
|                 | Only CD4IR             | 0.48 (0.18, 1.30) | 0.15 |
| HCT_Year        | Only B–cell IR         | 0.57 (0.21, 1.56) | 0.27 |
|                 | Both CD4 and B–cell IR | 0.76 (0.32, 1.81) | 0.54 |
|                 | Before 2015            | Reference         |      |
| 2015 or after   | 0.63 (0.41, 0.97)      | 0.03              |      |

| Variable      | N                      | Hazard ratio      | p    |
|---------------|------------------------|-------------------|------|
| Age           | 0–3 years              | Reference         |      |
|               | 3–10 years             | 0.68 (0.38, 1.23) | 0.21 |
|               | 10–18 years            | 0.87 (0.51, 1.49) | 0.62 |
|               | >18 years              | 0.32 (0.13, 0.76) | 0.01 |
| Diagnosis     | ALL                    | Reference         |      |
|               | AML                    | 1.28 (0.83, 1.95) | 0.26 |
|               | Other                  | 0.81 (0.45, 1.44) | 0.46 |
| HLA_match     | Matched                | Reference         |      |
|               | Mismatched             | 0.97 (0.65, 1.45) | 0.88 |
| CD4_Bcell_IR  | None                   | Reference         |      |
|               | Only CD4IR             | 0.50 (0.19, 1.33) | 0.17 |
|               | Only B–cell IR         | 0.58 (0.22, 1.55) | 0.27 |
| HCT_Year      | Both CD4 and B–cell IR | 0.78 (0.33, 1.84) | 0.57 |
|               | Before 2015            | Reference         |      |
| 2015 or after | 0.63 (0.42, 0.94)      | 0.02              |      |

**Table S3. Multivariable Cox Proportional Hazard Analysis for Relapse in Full Cohort.** CD4 and B cell immune reconstitution were not found to be a predictor of relapse in the full cohort in multivariable analyses. Only age > 18 years and transplant after 2015 were found to be predictive factors for relapse (left panel). Since there were 116 events of relapse, to control for overfitting, analyses were also run including less covariates (see methods), leading to similar results (right panel).

## Multivariable Cox Proportional Hazard Analysis for Relapse (AML)

| Variable        | N                      | Hazard ratio       | p     |
|-----------------|------------------------|--------------------|-------|
| Age             | 0–3 years              | Reference          |       |
|                 | 3–10 years             | 0.66 (0.24, 1.85)  | 0.429 |
|                 | 10–18 years            | 0.86 (0.37, 1.99)  | 0.722 |
|                 | >18 years              | 0.25 (0.05, 1.26)  | 0.093 |
| Status          | CR1                    | Reference          |       |
|                 | CR2 or more            | 1.11 (0.52, 2.39)  | 0.791 |
|                 | Active disease         | 3.58 (1.46, 8.78)  | 0.005 |
| Source          | BM                     | Reference          |       |
|                 | Cord                   | 1.12 (0.40, 3.12)  | 0.830 |
|                 | PBSC                   | 3.65 (0.90, 14.89) | 0.071 |
| HLA_match       | Matched                | Reference          |       |
|                 | Mismatched             | 1.30 (0.62, 2.71)  | 0.492 |
| Conditioning    | Only chemotherapy      | Reference          |       |
|                 | Chemo and TBI          | 1.05 (0.29, 3.80)  | 0.941 |
| TCD_Serotherapy | None                   | Reference          |       |
|                 | Only TCD               | 0.43 (0.07, 2.87)  | 0.387 |
|                 | Only Serotherapy       | 2.48 (1.02, 6.00)  | 0.045 |
| CD4_Bcell_IR    | Both                   | 0.31 (0.07, 1.38)  | 0.124 |
|                 | None                   | Reference          |       |
|                 | Only CD4IR             | 0.21 (0.04, 1.10)  | 0.065 |
| HCT_Year        | Only B–cell IR         | 0.27 (0.06, 1.21)  | 0.087 |
|                 | Both CD4 and B–cell IR | 0.24 (0.06, 0.92)  | 0.038 |
|                 | Before 2015            | Reference          |       |
| 2015 or after   | 0.35 (0.16, 0.78)      | 0.011              |       |

| Variable     | N                      | Hazard ratio       | p      |
|--------------|------------------------|--------------------|--------|
| Status       | CR1                    | Reference          |        |
|              | CR2 or more            | 1.16 (0.58, 2.35)  | 0.67   |
|              | Active disease         | 5.37 (2.41, 11.96) | <0.001 |
| CD4_Bcell_IR | None                   | Reference          |        |
|              | Only CD4IR             | 0.22 (0.05, 0.96)  | 0.04   |
|              | Only B–cell IR         | 0.26 (0.06, 1.12)  | 0.07   |
|              | Both CD4 and B–cell IR | 0.25 (0.07, 0.88)  | 0.03   |
| HCT_Year     | Before 2015            | Reference          |        |
|              | 2015 or after          | 0.43 (0.22, 0.84)  | 0.01   |

**Table S4. Multivariable Cox Proportional Hazard Analysis for Relapse in AML Patients.** Combined CD4 and B cell immune reconstitution were found to be a predictor of Relapse in AML patients in multivariable analyses. Active disease and transplant before 2015 were also found to be predictive for increased risk of relapse (left panel). Since there were 46 events of relapse, to control for overfitting, analyses were also run including less covariates (see methods), leading to similar results (right panel), although in this case CD4 immune reconstitution alone was found to be a predictor of relapse as well, indicating that these analyses might need more power and a larger AML cohort to confirm this effect.

# Supplemental Data

## Multivariable Cox Proportional Hazard Analysis for Relapse (ALL)

| Variable        | N                      | Hazard ratio       | p     |
|-----------------|------------------------|--------------------|-------|
| Age             | 0-3 years              | Reference          |       |
|                 | 3-10 years             | 0.78 (0.24, 2.50)  | 0.677 |
|                 | 10-18 years            | 0.93 (0.28, 3.02)  | 0.899 |
|                 | >18 years              | 0.51 (0.12, 2.16)  | 0.364 |
| Status          | CR1                    | Reference          |       |
|                 | CR2 or more            | 3.21 (1.51, 6.83)  | 0.002 |
| Source          | BM                     | Reference          |       |
|                 | Cord                   | 2.09 (0.77, 5.62)  | 0.146 |
|                 | PBSC                   | 1.01 (0.26, 3.98)  | 0.992 |
| HLA_match       | Matched                | Reference          |       |
|                 | Mismatched             | 0.68 (0.32, 1.43)  | 0.305 |
| Conditioning    | Only chemotherapy      | Reference          |       |
|                 | Chemo and TBI          | 0.60 (0.30, 1.22)  | 0.160 |
| TCD_Serotherapy | None                   | Reference          |       |
|                 | Only TCD               | 1.91 (0.35, 10.56) | 0.457 |
|                 | Only Serotherapy       | 0.60 (0.22, 1.62)  | 0.311 |
| CD4_Bcell_IR    | Both                   | 1.95 (0.47, 8.14)  | 0.361 |
|                 | None                   | Reference          |       |
|                 | Only CD4IR             | 0.75 (0.07, 7.66)  | 0.808 |
| HCT_Year        | Only B-cell IR         | 1.51 (0.18, 13.02) | 0.707 |
|                 | Both CD4 and B-cell IR | 2.84 (0.36, 22.15) | 0.319 |
|                 | Before 2015            | Reference          |       |
| 2015 or after   | 0.70 (0.36, 1.37)      | 0.303              |       |

| Variable               | N              | Hazard ratio       | p     |
|------------------------|----------------|--------------------|-------|
| Status                 | CR1            | Reference          |       |
|                        | CR2 or more    | 2.78 (1.46, 5.27)  | 0.002 |
| CD4_Bcell_IR           | None           | Reference          |       |
|                        | Only CD4IR     | 0.86 (0.09, 8.25)  | 0.894 |
|                        | Only B-cell IR | 2.50 (0.31, 20.37) | 0.391 |
| Both CD4 and B-cell IR | 115            | 3.92 (0.53, 28.84) | 0.179 |

**Table S5. Multivariable Cox Proportional Hazard Analysis for Relapse in ALL Patients.** CD4 and B cell immune reconstitution were not found to be a predictors of Relapse in ALL patients in multivariable analyses. Only complete remission 2 or more was found to be predictive for increased risk of relapse (left panel). Since there were 43 events of relapse, to control for overfitting, analyses were also run including less covariates (see methods), leading to similar results (right panel).

## Multivariable Cox Proportional Hazard Analysis for Acute GvHD Grade II-IV

| Variable        | N                      | Hazard ratio      | p      |
|-----------------|------------------------|-------------------|--------|
| Age             | 0-3 years              | Reference         |        |
|                 | 3-10 years             | 0.70 (0.40, 1.23) | 0.211  |
|                 | 10-18 years            | 0.50 (0.29, 0.85) | 0.010  |
|                 | >18 years              | 0.44 (0.22, 0.87) | 0.019  |
| Diagnosis       | ALL                    | Reference         |        |
|                 | AML                    | 1.38 (0.88, 2.16) | 0.158  |
| Source          | Other                  | 0.96 (0.59, 1.58) | 0.882  |
|                 | BM                     | Reference         |        |
|                 | Cord                   | 1.31 (0.75, 2.27) | 0.339  |
| HLA_match       | PBSC                   | 3.16 (1.27, 7.87) | 0.013  |
|                 | Matched                | Reference         |        |
| Conditioning    | Mismatched             | 1.01 (0.64, 1.59) | 0.979  |
|                 | Only chemotherapy      | Reference         |        |
| TCD_Serotherapy | Chemo and TBI          | 0.92 (0.58, 1.46) | 0.716  |
|                 | None                   | Reference         |        |
|                 | Only TCD               | 0.44 (0.15, 1.30) | 0.138  |
| CD4_Bcell_IR    | Only Serotherapy       | 0.50 (0.31, 0.82) | 0.006  |
|                 | Both                   | 0.15 (0.05, 0.41) | <0.001 |
|                 | None                   | Reference         |        |
| HCT_Year        | Only CD4IR             | 0.17 (0.11, 0.27) | <0.001 |
|                 | Only B-cell IR         | 0.10 (0.05, 0.19) | <0.001 |
|                 | Both CD4 and B-cell IR | 0.02 (0.01, 0.04) | <0.001 |
| HCT_Year        | Before 2015            | Reference         |        |
|                 | 2015 or after          | 0.77 (0.53, 1.13) | 0.179  |

| Variable        | N                      | Hazard ratio      | p      |
|-----------------|------------------------|-------------------|--------|
| Age             | 0-3 years              | Reference         |        |
|                 | 3-10 years             | 0.68 (0.39, 1.18) | 0.169  |
|                 | 10-18 years            | 0.50 (0.30, 0.82) | 0.006  |
|                 | >18 years              | 0.44 (0.23, 0.84) | 0.013  |
| Diagnosis       | ALL                    | Reference         |        |
|                 | AML                    | 1.43 (0.97, 2.10) | 0.073  |
|                 | Other                  | 0.96 (0.59, 1.55) | 0.861  |
| Source          | BM                     | Reference         |        |
|                 | Cord                   | 1.32 (0.84, 2.09) | 0.232  |
|                 | PBSC                   | 2.62 (1.17, 5.84) | 0.019  |
| TCD_Serotherapy | None                   | Reference         |        |
|                 | Only TCD               | 0.50 (0.19, 1.32) | 0.160  |
|                 | Only Serotherapy       | 0.50 (0.31, 0.80) | 0.004  |
| CD4_Bcell_IR    | Both                   | 0.18 (0.07, 0.45) | <0.001 |
|                 | None                   | Reference         |        |
|                 | Only CD4IR             | 0.18 (0.11, 0.28) | <0.001 |
| HCT_Year        | Only B-cell IR         | 0.10 (0.05, 0.19) | <0.001 |
|                 | Both CD4 and B-cell IR | 0.02 (0.01, 0.04) | <0.001 |
|                 | Before 2015            | Reference         |        |
| 2015 or after   | 0.79 (0.56, 1.13)      | 0.201             |        |

**Table S6. Multivariable Cox Proportional Hazard Analysis for Acute GvHD Grade II-IV.** CD4 and B cell immune reconstitution, as well as age and use of serotherapy were found to be predictors associated with decreased risk of aGvHD grade II-IV in multivariable analyses. Since there were 138 events of aGvHD grade II-IV, analyses were also run including less covariates (see methods), leading to similar results (right panel).

# Supplemental Data

## Multivariable Cox Proportional Hazard Analysis for Extensive Chronic GvHD

| Variable        | N                      | Hazard ratio       | p     |
|-----------------|------------------------|--------------------|-------|
| Age             | 0–3 years              | Reference          |       |
|                 | 3–10 years             | 1.27 (0.25, 6.49)  | 0.772 |
|                 | 10–18 years            | 1.68 (0.35, 8.10)  | 0.517 |
|                 | >18 years              | 2.04 (0.38, 11.06) | 0.409 |
| Diagnosis       | ALL                    | Reference          |       |
|                 | AML                    | 0.73 (0.28, 1.90)  | 0.519 |
| Source          | Other                  | 0.90 (0.34, 2.36)  | 0.825 |
|                 | BM                     | Reference          |       |
|                 | Cord                   | 0.62 (0.17, 2.21)  | 0.457 |
| HLA_match       | PBSC                   | 1.44 (0.27, 7.64)  | 0.669 |
|                 | Matched                | Reference          |       |
| Conditioning    | Mismatched             | 1.55 (0.62, 3.91)  | 0.349 |
|                 | Only chemotherapy      | Reference          |       |
| TCD_Serotherapy | Chemo and TBI          | 0.83 (0.34, 2.01)  | 0.681 |
|                 | None                   | Reference          |       |
|                 | Only TCD               | 0.60 (0.08, 4.75)  | 0.631 |
| CD4_Bcell_IR    | Only Serotherapy       | 0.60 (0.19, 1.88)  | 0.381 |
|                 | Both                   | 0.39 (0.07, 2.35)  | 0.306 |
|                 | None                   | Reference          |       |
|                 | Only CD4IR             | 0.34 (0.10, 1.11)  | 0.073 |
| HCT_Year        | Only B–cell IR         | 0.29 (0.08, 1.05)  | 0.059 |
|                 | Both CD4 and B–cell IR | 0.16 (0.05, 0.49)  | 0.001 |
|                 | Before 2015            | Reference          |       |
|                 | 2015 or after          | 0.51 (0.23, 1.15)  | 0.105 |

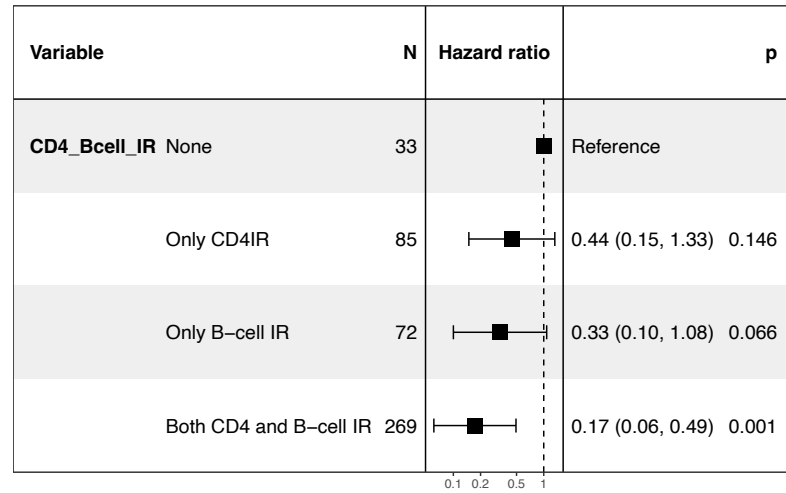

**Table S7. Multivariable Cox Proportional Hazard Analysis for Extensive Chronic GvHD.** Combined CD4 and B cell immune reconstitution was found to be a predictor of decreased risk of extensive cGvHD in multivariable analysis. The p-value for CD4 and B cell immune reconstitution separately did not reach significance at a threshold of 0.05, but the confidence interval is clearly not centered around 1, suggesting there might be a lack of power, secondary to low number of events (31), rather than a lack of effect (left panel). Due to the low number of events, multivariate analyses were also done including less covariates, to make up for overfitting (right panel), indicating similar results.
